# Supplementary material
Source: PubMed Central journal article supplement (PMC3005712)
Supplement: NIHMS249064-supplement-2_si_002.pdf [file NIHMS249064-supplement-2_si_002.pdf]

## **Enantioselective Synthesis of (-)-Sclerophytin A by a Stereoconverging Epoxide Hydrolysis**

Bin Wang, Armando P. Ramirez, Justin Slade and James P. Morken \*

*Department of Chemistry, Merkert Chemistry Center, Boston College, Chestnut Hill, MA 02467*

### **Supporting Information**

#### **Table of Contents**

|                                                                            |              |
|----------------------------------------------------------------------------|--------------|
| <b>X-ray Crystallographic Data of racemic 6:</b> .....                     | <i>S-2a</i>  |
| <b>X-ray Crystallographic Data of racemic <math>\alpha</math>-9:</b> ..... | <i>S-18a</i> |
| <b>X-ray Crystallographic Data of racemic 11:</b> .....                    | <i>S-29a</i> |

• **X-ray crystal structure of racemic 6:**

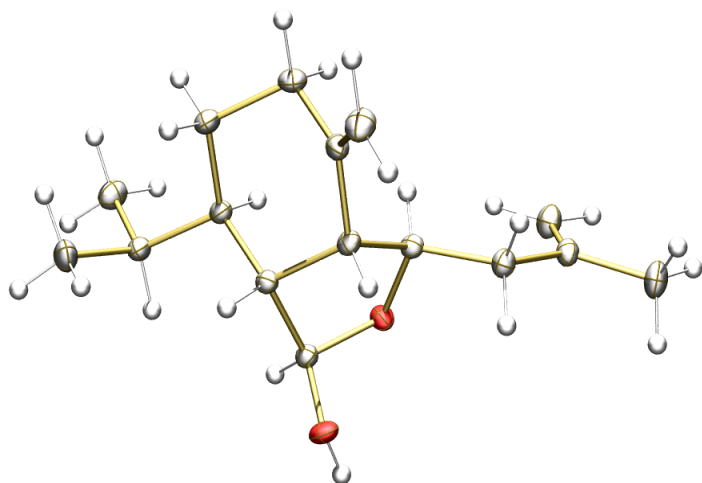

Table 1. Crystal data and structure refinement for C<sub>16</sub>H<sub>26</sub>O<sub>2</sub>.

|                                 |                                                |                  |
|---------------------------------|------------------------------------------------|------------------|
| Identification code             | C <sub>16</sub> H <sub>26</sub> O <sub>2</sub> |                  |
| Empirical formula               | C <sub>16</sub> H <sub>26</sub> O <sub>2</sub> |                  |
| Formula weight                  | 250.37                                         |                  |
| Temperature                     | 100(2) K                                       |                  |
| Wavelength                      | 0.71073 Å                                      |                  |
| Crystal system                  | Monoclinic                                     |                  |
| Space group                     | P 1 2 <sub>1</sub> /n 1                        |                  |
| Unit cell dimensions            | a = 20.398(7) Å                                | α = 90°.         |
|                                 | b = 5.6912(19) Å                               | β = 112.062(4)°. |
|                                 | c = 26.770(9) Å                                | γ = 90°.         |
| Volume                          | 2880.2(17) Å <sup>3</sup>                      |                  |
| Z                               | 8                                              |                  |
| Density (calculated)            | 1.155 Mg/m <sup>3</sup>                        |                  |
| Absorption coefficient          | 0.074 mm <sup>-1</sup>                         |                  |
| F(000)                          | 1104                                           |                  |
| Crystal size                    | 0.27 x 0.05 x 0.03 mm <sup>3</sup>             |                  |
| Theta range for data collection | 1.64 to 28.33°.                                |                  |
| Index ranges                    | -26 ≤ h ≤ 27, -7 ≤ k ≤ 7, -35 ≤ l ≤ 34         |                  |
| Reflections collected           | 33322                                          |                  |
| Independent reflections         | 7103 [R(int) = 0.0347]                         |                  |
| Completeness to theta = 28.33°  | 98.8 %                                         |                  |
| Absorption correction           | Semi-empirical from equivalents                |                  |

|                                   |                                             |
|-----------------------------------|---------------------------------------------|
| Max. and min. transmission        | 0.9978 and 0.9804                           |
| Refinement method                 | Full-matrix least-squares on F <sup>2</sup> |
| Data / restraints / parameters    | 7103 / 52 / 483                             |
| Goodness-of-fit on F <sup>2</sup> | 1.035                                       |
| Final R indices [I>2sigma(I)]     | R1 = 0.0463, wR2 = 0.1126                   |
| R indices (all data)              | R1 = 0.0579, wR2 = 0.1209                   |
| Extinction coefficient            | na                                          |
| Largest diff. peak and hole       | 0.496 and -0.206 e.Å <sup>-3</sup>          |

Table 2. Atomic coordinates (x 10<sup>4</sup>) and equivalent isotropic displacement parameters (Å<sup>2</sup>x 10<sup>3</sup>) for C16H26O2. U(eq) is defined as one third of the trace of the orthogonalized U<sup>ij</sup> tensor.

|       | x       | y        | z        | U(eq) |
|-------|---------|----------|----------|-------|
| O(1)  | 3491(1) | -2359(1) | 723(1)   | 16(1) |
| O(2)  | 3093(1) | 1528(1)  | 665(1)   | 18(1) |
| C(1)  | 2892(1) | -842(2)  | 616(1)   | 14(1) |
| C(2)  | 2423(1) | -1321(2) | 30(1)    | 14(1) |
| C(3)  | 1979(1) | -3570(2) | -39(1)   | 15(1) |
| C(4)  | 1717(1) | -4442(2) | -624(1)  | 18(1) |
| C(5)  | 2333(1) | -4892(2) | -807(1)  | 20(1) |
| C(6)  | 2741(1) | -2653(2) | -761(1)  | 17(1) |
| C(7)  | 2996(1) | -1523(2) | -215(1)  | 14(1) |
| C(8)  | 3583(1) | -2900(2) | 224(1)   | 14(1) |
| C(9)  | 1367(1) | -3254(2) | 162(1)   | 17(1) |
| C(10) | 757(1)  | -1772(2) | -216(1)  | 24(1) |
| C(11) | 1082(1) | -5622(2) | 257(1)   | 23(1) |
| C(12) | 2826(1) | -1643(2) | -1180(1) | 23(1) |
| C(13) | 4317(1) | -2247(2) | 260(1)   | 16(1) |
| C(14) | 4917(1) | -3769(2) | 613(1)   | 17(1) |
| C(15) | 4830(1) | -5748(2) | 840(1)   | 22(1) |
| C(16) | 5638(1) | -2876(2) | 680(1)   | 23(1) |
| O(3)  | 3976(1) | 1702(1)  | 1759(1)  | 16(1) |
| O(4)  | 4368(1) | -2195(1) | 1841(1)  | 19(1) |
| C(17) | 4571(1) | 171(2)   | 1868(1)  | 15(1) |
| C(18) | 5058(1) | 758(2)   | 2444(1)  | 14(1) |

|       |         |         |         |       |
|-------|---------|---------|---------|-------|
| C(19) | 5487(1) | 3011(2) | 2474(1) | 15(1) |
| C(20) | 5771(1) | 3997(2) | 3049(1) | 19(1) |
| C(21) | 5163(1) | 4574(2) | 3232(1) | 20(1) |
| C(22) | 4749(1) | 2395(2) | 3226(1) | 18(1) |
| C(23) | 4505(1) | 1029(2) | 2706(1) | 15(1) |
| C(24) | 3877(1) | 2201(2) | 2256(1) | 14(1) |
| C(25) | 6077(1) | 2674(2) | 2250(1) | 18(1) |
| C(26) | 6715(1) | 1304(2) | 2625(1) | 24(1) |
| C(27) | 6316(1) | 5039(2) | 2110(1) | 24(1) |
| C(28) | 4617(1) | 1678(3) | 3649(1) | 27(1) |
| C(29) | 3171(1) | 1278(2) | 2232(1) | 17(1) |
| C(30) | 2522(1) | 2469(2) | 1840(1) | 19(1) |
| C(31) | 2539(1) | 4520(2) | 1601(1) | 24(1) |
| C(32) | 1847(1) | 1245(3) | 1761(1) | 34(1) |

---

Table 3. Bond lengths [ $\text{\AA}$ ] and angles [ $^\circ$ ] for C16H26O2.

---

|            |            |
|------------|------------|
| O(1)-C(1)  | 1.4347(13) |
| O(1)-C(8)  | 1.4509(13) |
| O(2)-C(1)  | 1.4012(14) |
| O(2)-H(2O) | 0.866(13)  |
| C(1)-C(2)  | 1.5242(15) |
| C(1)-H(1)  | 0.985(11)  |
| C(2)-C(3)  | 1.5384(15) |
| C(2)-C(7)  | 1.5444(15) |
| C(2)-H(2)  | 0.987(11)  |
| C(3)-C(4)  | 1.5350(16) |
| C(3)-C(9)  | 1.5424(15) |
| C(3)-H(3)  | 0.984(11)  |
| C(4)-C(5)  | 1.5315(16) |
| C(4)-H(4A) | 0.992(12)  |
| C(4)-H(4B) | 0.982(12)  |
| C(5)-C(6)  | 1.5015(17) |
| C(5)-H(5A) | 0.997(12)  |
| C(5)-H(5B) | 0.991(12)  |
| C(6)-C(12) | 1.3278(17) |

|              |            |
|--------------|------------|
| C(6)-C(7)    | 1.5012(15) |
| C(7)-C(8)    | 1.5391(15) |
| C(7)-H(7)    | 0.988(11)  |
| C(8)-C(13)   | 1.5108(16) |
| C(8)-H(8)    | 0.984(11)  |
| C(9)-C(11)   | 1.5260(17) |
| C(9)-C(10)   | 1.5287(16) |
| C(9)-H(9)    | 1.001(12)  |
| C(10)-H(10A) | 0.983(13)  |
| C(10)-H(10B) | 0.985(13)  |
| C(10)-H(10C) | 0.999(13)  |
| C(11)-H(11A) | 0.980(12)  |
| C(11)-H(11B) | 0.986(13)  |
| C(11)-H(11C) | 0.985(13)  |
| C(12)-H(12A) | 0.986(12)  |
| C(12)-H(12B) | 0.967(12)  |
| C(13)-C(14)  | 1.5074(15) |
| C(13)-H(13A) | 0.980(12)  |
| C(13)-H(13B) | 0.981(11)  |
| C(14)-C(15)  | 1.3230(17) |
| C(14)-C(16)  | 1.5005(16) |
| C(15)-H(15A) | 0.979(12)  |
| C(15)-H(15B) | 0.986(12)  |
| C(16)-H(16A) | 0.981(13)  |
| C(16)-H(16B) | 0.978(13)  |
| C(16)-H(16C) | 0.988(13)  |
| O(3)-C(17)   | 1.4311(13) |
| O(3)-C(24)   | 1.4485(13) |
| O(4)-C(17)   | 1.4025(14) |
| O(4)-H(4O)   | 0.876(13)  |
| C(17)-C(18)  | 1.5238(15) |
| C(17)-H(17)  | 0.994(11)  |
| C(18)-C(19)  | 1.5376(16) |
| C(18)-C(23)  | 1.5452(15) |
| C(18)-H(18)  | 0.992(11)  |
| C(19)-C(20)  | 1.5332(16) |

|              |            |
|--------------|------------|
| C(19)-C(25)  | 1.5436(16) |
| C(19)-H(19)  | 0.981(12)  |
| C(20)-C(21)  | 1.5300(16) |
| C(20)-H(20A) | 0.994(12)  |
| C(20)-H(20B) | 0.995(12)  |
| C(21)-C(22)  | 1.4971(17) |
| C(21)-H(21A) | 0.989(12)  |
| C(21)-H(21B) | 0.999(12)  |
| C(22)-C(28)  | 1.3248(17) |
| C(22)-C(23)  | 1.5047(16) |
| C(23)-C(24)  | 1.5416(15) |
| C(23)-H(23)  | 0.989(12)  |
| C(24)-C(29)  | 1.5122(16) |
| C(24)-H(24)  | 0.989(12)  |
| C(25)-C(27)  | 1.5252(17) |
| C(25)-C(26)  | 1.5257(16) |
| C(25)-H(25)  | 1.002(12)  |
| C(26)-H(26A) | 0.976(13)  |
| C(26)-H(26B) | 0.994(13)  |
| C(26)-H(26C) | 0.979(13)  |
| C(27)-H(27A) | 0.979(13)  |
| C(27)-H(27B) | 0.998(13)  |
| C(27)-H(27C) | 0.981(13)  |
| C(28)-H(28A) | 0.974(12)  |
| C(28)-H(28B) | 0.978(13)  |
| C(29)-C(30)  | 1.5064(16) |
| C(29)-H(29A) | 0.973(12)  |
| C(29)-H(29B) | 0.984(12)  |
| C(30)-C(31)  | 1.3378(18) |
| C(30)-C(32)  | 1.4846(18) |
| C(31)-H(31A) | 0.965(12)  |
| C(31)-H(31B) | 0.982(12)  |
| C(32)-H(32A) | 0.985(14)  |
| C(32)-H(32B) | 1.045(14)  |
| C(32)-H(32C) | 0.973(14)  |

|                  |            |
|------------------|------------|
| C(1)-O(1)-C(8)   | 109.74(8)  |
| C(1)-O(2)-H(2O)  | 107.0(10)  |
| O(2)-C(1)-O(1)   | 111.30(9)  |
| O(2)-C(1)-C(2)   | 108.46(9)  |
| O(1)-C(1)-C(2)   | 104.91(8)  |
| O(2)-C(1)-H(1)   | 110.2(8)   |
| O(1)-C(1)-H(1)   | 105.6(8)   |
| C(2)-C(1)-H(1)   | 116.2(8)   |
| C(1)-C(2)-C(3)   | 112.68(9)  |
| C(1)-C(2)-C(7)   | 99.60(8)   |
| C(3)-C(2)-C(7)   | 113.14(9)  |
| C(1)-C(2)-H(2)   | 111.3(8)   |
| C(3)-C(2)-H(2)   | 109.7(8)   |
| C(7)-C(2)-H(2)   | 110.1(7)   |
| C(4)-C(3)-C(2)   | 110.74(9)  |
| C(4)-C(3)-C(9)   | 112.11(9)  |
| C(2)-C(3)-C(9)   | 112.23(9)  |
| C(4)-C(3)-H(3)   | 107.2(8)   |
| C(2)-C(3)-H(3)   | 107.4(8)   |
| C(9)-C(3)-H(3)   | 106.8(8)   |
| C(5)-C(4)-C(3)   | 111.62(9)  |
| C(5)-C(4)-H(4A)  | 108.4(8)   |
| C(3)-C(4)-H(4A)  | 110.1(8)   |
| C(5)-C(4)-H(4B)  | 108.9(8)   |
| C(3)-C(4)-H(4B)  | 110.8(8)   |
| H(4A)-C(4)-H(4B) | 106.8(11)  |
| C(6)-C(5)-C(4)   | 109.18(10) |
| C(6)-C(5)-H(5A)  | 111.1(8)   |
| C(4)-C(5)-H(5A)  | 108.7(8)   |
| C(6)-C(5)-H(5B)  | 110.3(8)   |
| C(4)-C(5)-H(5B)  | 110.4(8)   |
| H(5A)-C(5)-H(5B) | 107.1(11)  |
| C(12)-C(6)-C(7)  | 122.01(11) |
| C(12)-C(6)-C(5)  | 122.90(11) |
| C(7)-C(6)-C(5)   | 114.91(9)  |
| C(6)-C(7)-C(8)   | 114.26(9)  |

|                     |            |
|---------------------|------------|
| C(6)-C(7)-C(2)      | 113.89(9)  |
| C(8)-C(7)-C(2)      | 102.15(9)  |
| C(6)-C(7)-H(7)      | 109.2(8)   |
| C(8)-C(7)-H(7)      | 109.1(7)   |
| C(2)-C(7)-H(7)      | 107.9(7)   |
| O(1)-C(8)-C(13)     | 110.86(9)  |
| O(1)-C(8)-C(7)      | 105.22(8)  |
| C(13)-C(8)-C(7)     | 113.10(9)  |
| O(1)-C(8)-H(8)      | 105.5(8)   |
| C(13)-C(8)-H(8)     | 111.4(8)   |
| C(7)-C(8)-H(8)      | 110.3(8)   |
| C(11)-C(9)-C(10)    | 109.30(10) |
| C(11)-C(9)-C(3)     | 111.30(9)  |
| C(10)-C(9)-C(3)     | 113.45(10) |
| C(11)-C(9)-H(9)     | 108.3(8)   |
| C(10)-C(9)-H(9)     | 107.7(8)   |
| C(3)-C(9)-H(9)      | 106.6(8)   |
| C(9)-C(10)-H(10A)   | 111.0(9)   |
| C(9)-C(10)-H(10B)   | 110.5(10)  |
| H(10A)-C(10)-H(10B) | 107.6(13)  |
| C(9)-C(10)-H(10C)   | 113.0(9)   |
| H(10A)-C(10)-H(10C) | 107.8(13)  |
| H(10B)-C(10)-H(10C) | 106.6(13)  |
| C(9)-C(11)-H(11A)   | 110.4(9)   |
| C(9)-C(11)-H(11B)   | 111.6(9)   |
| H(11A)-C(11)-H(11B) | 108.1(13)  |
| C(9)-C(11)-H(11C)   | 110.6(9)   |
| H(11A)-C(11)-H(11C) | 108.3(13)  |
| H(11B)-C(11)-H(11C) | 107.6(13)  |
| C(6)-C(12)-H(12A)   | 121.8(9)   |
| C(6)-C(12)-H(12B)   | 122.0(9)   |
| H(12A)-C(12)-H(12B) | 116.2(13)  |
| C(14)-C(13)-C(8)    | 116.84(10) |
| C(14)-C(13)-H(13A)  | 110.5(8)   |
| C(8)-C(13)-H(13A)   | 107.0(8)   |
| C(14)-C(13)-H(13B)  | 108.9(8)   |



|                     |            |
|---------------------|------------|
| C(8)-C(13)-H(13B)   | 109.0(8)   |
| H(13A)-C(13)-H(13B) | 103.8(11)  |
| C(15)-C(14)-C(16)   | 121.82(11) |
| C(15)-C(14)-C(13)   | 123.99(10) |
| C(16)-C(14)-C(13)   | 114.17(10) |
| C(14)-C(15)-H(15A)  | 123.4(9)   |
| C(14)-C(15)-H(15B)  | 119.3(8)   |
| H(15A)-C(15)-H(15B) | 117.4(12)  |
| C(14)-C(16)-H(16A)  | 111.0(9)   |
| C(14)-C(16)-H(16B)  | 109.3(9)   |
| H(16A)-C(16)-H(16B) | 109.7(12)  |
| C(14)-C(16)-H(16C)  | 111.0(9)   |
| H(16A)-C(16)-H(16C) | 109.6(13)  |
| H(16B)-C(16)-H(16C) | 106.2(13)  |
| C(17)-O(3)-C(24)    | 109.33(8)  |
| C(17)-O(4)-H(4O)    | 106.5(11)  |
| O(4)-C(17)-O(3)     | 111.32(9)  |
| O(4)-C(17)-C(18)    | 109.31(9)  |
| O(3)-C(17)-C(18)    | 104.73(8)  |
| O(4)-C(17)-H(17)    | 110.7(8)   |
| O(3)-C(17)-H(17)    | 104.7(8)   |
| C(18)-C(17)-H(17)   | 115.9(8)   |
| C(17)-C(18)-C(19)   | 112.22(9)  |
| C(17)-C(18)-C(23)   | 99.90(9)   |
| C(19)-C(18)-C(23)   | 113.07(9)  |
| C(17)-C(18)-H(18)   | 111.3(8)   |
| C(19)-C(18)-H(18)   | 109.5(8)   |
| C(23)-C(18)-H(18)   | 110.6(8)   |
| C(20)-C(19)-C(18)   | 110.53(9)  |
| C(20)-C(19)-C(25)   | 112.32(9)  |
| C(18)-C(19)-C(25)   | 112.80(9)  |
| C(20)-C(19)-H(19)   | 107.8(8)   |
| C(18)-C(19)-H(19)   | 107.3(8)   |
| C(25)-C(19)-H(19)   | 105.7(8)   |
| C(21)-C(20)-C(19)   | 110.74(9)  |
| C(21)-C(20)-H(20A)  | 110.1(8)   |

|                     |            |
|---------------------|------------|
| C(19)-C(20)-H(20A)  | 110.3(8)   |
| C(21)-C(20)-H(20B)  | 110.3(8)   |
| C(19)-C(20)-H(20B)  | 109.2(8)   |
| H(20A)-C(20)-H(20B) | 106.1(11)  |
| C(22)-C(21)-C(20)   | 109.89(10) |
| C(22)-C(21)-H(21A)  | 111.1(8)   |
| C(20)-C(21)-H(21A)  | 111.0(8)   |
| C(22)-C(21)-H(21B)  | 108.2(8)   |
| C(20)-C(21)-H(21B)  | 108.6(8)   |
| H(21A)-C(21)-H(21B) | 107.9(12)  |
| C(28)-C(22)-C(21)   | 122.76(11) |
| C(28)-C(22)-C(23)   | 121.89(11) |
| C(21)-C(22)-C(23)   | 115.33(10) |
| C(22)-C(23)-C(24)   | 112.88(9)  |
| C(22)-C(23)-C(18)   | 115.26(9)  |
| C(24)-C(23)-C(18)   | 102.76(9)  |
| C(22)-C(23)-H(23)   | 110.3(8)   |
| C(24)-C(23)-H(23)   | 107.0(8)   |
| C(18)-C(23)-H(23)   | 108.1(8)   |
| O(3)-C(24)-C(29)    | 110.67(9)  |
| O(3)-C(24)-C(23)    | 105.82(8)  |
| C(29)-C(24)-C(23)   | 112.40(9)  |
| O(3)-C(24)-H(24)    | 106.7(8)   |
| C(29)-C(24)-H(24)   | 110.1(7)   |
| C(23)-C(24)-H(24)   | 110.9(8)   |
| C(27)-C(25)-C(26)   | 109.86(10) |
| C(27)-C(25)-C(19)   | 110.69(10) |
| C(26)-C(25)-C(19)   | 113.86(10) |
| C(27)-C(25)-H(25)   | 107.9(8)   |
| C(26)-C(25)-H(25)   | 106.9(8)   |
| C(19)-C(25)-H(25)   | 107.3(8)   |
| C(25)-C(26)-H(26A)  | 110.3(9)   |
| C(25)-C(26)-H(26B)  | 112.4(9)   |
| H(26A)-C(26)-H(26B) | 108.7(13)  |
| C(25)-C(26)-H(26C)  | 110.2(10)  |
| H(26A)-C(26)-H(26C) | 108.6(13)  |

|                     |            |
|---------------------|------------|
| H(26B)-C(26)-H(26C) | 106.6(13)  |
| C(25)-C(27)-H(27A)  | 111.6(10)  |
| C(25)-C(27)-H(27B)  | 110.5(9)   |
| H(27A)-C(27)-H(27B) | 106.9(13)  |
| C(25)-C(27)-H(27C)  | 110.8(9)   |
| H(27A)-C(27)-H(27C) | 108.5(13)  |
| H(27B)-C(27)-H(27C) | 108.4(13)  |
| C(22)-C(28)-H(28A)  | 120.6(9)   |
| C(22)-C(28)-H(28B)  | 122.4(10)  |
| H(28A)-C(28)-H(28B) | 117.1(13)  |
| C(30)-C(29)-C(24)   | 116.60(10) |
| C(30)-C(29)-H(29A)  | 109.0(8)   |
| C(24)-C(29)-H(29A)  | 108.3(8)   |
| C(30)-C(29)-H(29B)  | 109.4(8)   |
| C(24)-C(29)-H(29B)  | 107.5(8)   |
| H(29A)-C(29)-H(29B) | 105.5(11)  |
| C(31)-C(30)-C(32)   | 122.04(11) |
| C(31)-C(30)-C(29)   | 123.47(11) |
| C(32)-C(30)-C(29)   | 114.41(11) |
| C(30)-C(31)-H(31A)  | 123.2(9)   |
| C(30)-C(31)-H(31B)  | 118.4(9)   |
| H(31A)-C(31)-H(31B) | 118.2(12)  |
| C(30)-C(32)-H(32A)  | 113.0(11)  |
| C(30)-C(32)-H(32B)  | 108.5(10)  |
| H(32A)-C(32)-H(32B) | 113.6(14)  |
| C(30)-C(32)-H(32C)  | 105.2(11)  |
| H(32A)-C(32)-H(32C) | 105.1(16)  |
| H(32B)-C(32)-H(32C) | 111.1(15)  |

---

Symmetry transformations used to generate equivalent atoms:

Table 4. Anisotropic displacement parameters ( $\text{\AA}^2 \times 10^3$ ) for C<sub>16</sub>H<sub>26</sub>O<sub>2</sub>. The anisotropic displacement factor exponent takes the form:  $-2\pi^2 [ h^2 a^{*2} U^{11} + \dots + 2 h k a^* b^* U^{12} ]$

---

|      | U <sup>11</sup> | U <sup>22</sup> | U <sup>33</sup> | U <sup>23</sup> | U <sup>13</sup> | U <sup>12</sup> |
|------|-----------------|-----------------|-----------------|-----------------|-----------------|-----------------|
| O(1) | 16(1)           | 20(1)           | 12(1)           | 0(1)            | 4(1)            | 3(1)            |

---

|       |       |       |       |       |       |       |
|-------|-------|-------|-------|-------|-------|-------|
| O(2)  | 20(1) | 14(1) | 14(1) | -2(1) | 1(1)  | -2(1) |
| C(1)  | 14(1) | 14(1) | 14(1) | -1(1) | 4(1)  | 0(1)  |
| C(2)  | 14(1) | 14(1) | 12(1) | 0(1)  | 4(1)  | 1(1)  |
| C(3)  | 14(1) | 13(1) | 15(1) | -1(1) | 3(1)  | 0(1)  |
| C(4)  | 16(1) | 19(1) | 17(1) | -4(1) | 4(1)  | -3(1) |
| C(5)  | 21(1) | 21(1) | 16(1) | -6(1) | 6(1)  | -1(1) |
| C(6)  | 14(1) | 21(1) | 14(1) | -2(1) | 4(1)  | 2(1)  |
| C(7)  | 13(1) | 15(1) | 13(1) | 0(1)  | 3(1)  | 0(1)  |
| C(8)  | 14(1) | 15(1) | 12(1) | 0(1)  | 4(1)  | 0(1)  |
| C(9)  | 15(1) | 18(1) | 17(1) | -4(1) | 6(1)  | -2(1) |
| C(10) | 16(1) | 22(1) | 32(1) | -1(1) | 7(1)  | 2(1)  |
| C(11) | 23(1) | 23(1) | 23(1) | -1(1) | 10(1) | -6(1) |
| C(12) | 21(1) | 32(1) | 16(1) | -1(1) | 6(1)  | -2(1) |
| C(13) | 15(1) | 16(1) | 17(1) | 2(1)  | 5(1)  | 0(1)  |
| C(14) | 13(1) | 22(1) | 15(1) | 0(1)  | 4(1)  | 1(1)  |
| C(15) | 17(1) | 24(1) | 22(1) | 5(1)  | 4(1)  | 1(1)  |
| C(16) | 14(1) | 28(1) | 25(1) | 5(1)  | 6(1)  | -1(1) |
| O(3)  | 16(1) | 20(1) | 11(1) | 1(1)  | 4(1)  | 5(1)  |
| O(4)  | 22(1) | 16(1) | 15(1) | -2(1) | 2(1)  | -1(1) |
| C(17) | 15(1) | 15(1) | 14(1) | 0(1)  | 4(1)  | 1(1)  |
| C(18) | 15(1) | 14(1) | 12(1) | 0(1)  | 3(1)  | 2(1)  |
| C(19) | 15(1) | 16(1) | 14(1) | 1(1)  | 4(1)  | 1(1)  |
| C(20) | 18(1) | 20(1) | 17(1) | -2(1) | 4(1)  | -2(1) |
| C(21) | 23(1) | 20(1) | 17(1) | -4(1) | 7(1)  | 0(1)  |
| C(22) | 16(1) | 20(1) | 14(1) | 0(1)  | 3(1)  | 4(1)  |
| C(23) | 16(1) | 15(1) | 13(1) | 2(1)  | 4(1)  | 1(1)  |
| C(24) | 15(1) | 15(1) | 11(1) | 0(1)  | 4(1)  | 2(1)  |
| C(25) | 15(1) | 22(1) | 15(1) | -1(1) | 4(1)  | 0(1)  |
| C(26) | 16(1) | 31(1) | 24(1) | 1(1)  | 4(1)  | 6(1)  |
| C(27) | 22(1) | 28(1) | 23(1) | 1(1)  | 9(1)  | -5(1) |
| C(28) | 28(1) | 34(1) | 16(1) | 0(1)  | 8(1)  | -3(1) |
| C(29) | 17(1) | 18(1) | 17(1) | 2(1)  | 6(1)  | 0(1)  |
| C(30) | 14(1) | 24(1) | 18(1) | 0(1)  | 6(1)  | 3(1)  |
| C(31) | 19(1) | 26(1) | 23(1) | 4(1)  | 4(1)  | 3(1)  |
| C(32) | 18(1) | 32(1) | 46(1) | 7(1)  | 3(1)  | 0(1)  |

---

Table 5. Hydrogen coordinates ( $\times 10^4$ ) and isotropic displacement parameters ( $\text{\AA}^2 \times 10^{-3}$ ) for C16H26O2.

|        | x       | y         | z        | U(eq) |
|--------|---------|-----------|----------|-------|
| H(2O)  | 3326(7) | 1800(30)  | 1004(5)  | 27    |
| H(1)   | 2692(7) | -1250(20) | 887(5)   | 17    |
| H(2)   | 2109(6) | 30(20)    | -130(5)  | 16    |
| H(3)   | 2291(7) | -4790(20) | 188(5)   | 18    |
| H(4A)  | 1398(7) | -3260(20) | -868(5)  | 22    |
| H(4B)  | 1442(7) | -5900(20) | -666(5)  | 22    |
| H(5A)  | 2639(7) | -6150(20) | -577(5)  | 23    |
| H(5B)  | 2154(7) | -5470(20) | -1184(5) | 23    |
| H(7)   | 3168(6) | 80(20)    | -240(5)  | 17    |
| H(8)   | 3499(7) | -4600(20) | 170(5)   | 17    |
| H(9)   | 1569(7) | -2410(20) | 515(5)   | 20    |
| H(10A) | 421(8)  | -1370(30) | -45(6)   | 35    |
| H(10B) | 496(8)  | -2650(30) | -549(6)  | 35    |
| H(10C) | 918(8)  | -280(20)  | -327(6)  | 35    |
| H(11A) | 746(7)  | -5400(30) | 435(6)   | 34    |
| H(11B) | 1465(7) | -6660(30) | 484(6)   | 34    |
| H(11C) | 837(8)  | -6440(30) | -88(5)   | 34    |
| H(12A) | 2651(7) | -2380(30) | -1540(5) | 28    |
| H(12B) | 3063(7) | -150(20)  | -1150(6) | 28    |
| H(13A) | 4395(7) | -600(20)  | 378(5)   | 20    |
| H(13B) | 4324(7) | -2210(20) | -104(5)  | 20    |
| H(15A) | 4366(7) | -6350(30) | 809(6)   | 26    |
| H(15B) | 5249(7) | -6670(20) | 1058(5)  | 26    |
| H(16A) | 6008(7) | -3970(30) | 897(6)   | 34    |
| H(16B) | 5713(8) | -1340(20) | 856(6)   | 34    |
| H(16C) | 5676(8) | -2630(30) | 327(5)   | 34    |
| H(4O)  | 4133(8) | -2510(30) | 1500(5)  | 28    |
| H(17)  | 4758(7) | 540(20)   | 1584(5)  | 18    |
| H(18)  | 5385(6) | -560(20)  | 2611(5)  | 17    |

|        |          |          |         |       |
|--------|----------|----------|---------|-------|
| H(19)  | 5163(7)  | 4180(20) | 2239(5) | 19    |
| H(20A) | 6061(7)  | 5420(20) | 3070(5) | 22    |
| H(20B) | 6095(7)  | 2830(20) | 3296(5) | 22    |
| H(21A) | 5342(7)  | 5310(20) | 3593(5) | 24    |
| H(21B) | 4841(7)  | 5720(20) | 2973(5) | 24    |
| H(23)  | 4348(7)  | -560(20) | 2762(5) | 18    |
| H(24)  | 3895(7)  | 3930(20) | 2298(5) | 17    |
| H(25)  | 5870(7)  | 1740(20) | 1909(5) | 21    |
| H(26A) | 7025(8)  | 880(30)  | 2437(6) | 37    |
| H(26B) | 6576(8)  | -150(30) | 2766(6) | 37    |
| H(26C) | 6984(8)  | 2260(30) | 2939(6) | 37    |
| H(27A) | 6641(8)  | 4850(30) | 1921(6) | 36    |
| H(27B) | 6575(8)  | 5950(30) | 2445(6) | 36    |
| H(27C) | 5909(7)  | 5970(30) | 1882(6) | 36    |
| H(28A) | 4368(7)  | 210(20)  | 3637(6) | 25(4) |
| H(28B) | 4759(8)  | 2580(30) | 3984(6) | 35(4) |
| H(29A) | 3161(7)  | 1370(20) | 2592(5) | 21    |
| H(29B) | 3153(7)  | -410(20) | 2148(5) | 21    |
| H(31A) | 2972(7)  | 5280(30) | 1623(6) | 28    |
| H(31B) | 2089(7)  | 5230(30) | 1367(6) | 28    |
| H(32A) | 1435(8)  | 1970(30) | 1480(6) | 52    |
| H(32B) | 1797(9)  | 1110(30) | 2135(6) | 52    |
| H(32C) | 1892(10) | -300(30) | 1621(7) | 52    |

Table 6. Torsion angles [°] for C16H26O2.

|                     |            |
|---------------------|------------|
| C(8)-O(1)-C(1)-O(2) | -92.17(10) |
| C(8)-O(1)-C(1)-C(2) | 24.93(11)  |
| O(2)-C(1)-C(2)-C(3) | -161.09(9) |
| O(1)-C(1)-C(2)-C(3) | 79.88(10)  |
| O(2)-C(1)-C(2)-C(7) | 78.73(10)  |
| O(1)-C(1)-C(2)-C(7) | -40.30(10) |
| C(1)-C(2)-C(3)-C(4) | -160.71(9) |
| C(7)-C(2)-C(3)-C(4) | -48.68(12) |
| C(1)-C(2)-C(3)-C(9) | 73.15(11)  |

|                         |             |
|-------------------------|-------------|
| C(7)-C(2)-C(3)-C(9)     | -174.81(9)  |
| C(2)-C(3)-C(4)-C(5)     | 57.27(12)   |
| C(9)-C(3)-C(4)-C(5)     | -176.53(9)  |
| C(3)-C(4)-C(5)-C(6)     | -59.33(12)  |
| C(4)-C(5)-C(6)-C(12)    | -120.53(12) |
| C(4)-C(5)-C(6)-C(7)     | 54.58(12)   |
| C(12)-C(6)-C(7)-C(8)    | -115.69(13) |
| C(5)-C(6)-C(7)-C(8)     | 69.15(12)   |
| C(12)-C(6)-C(7)-C(2)    | 127.44(12)  |
| C(5)-C(6)-C(7)-C(2)     | -47.72(13)  |
| C(1)-C(2)-C(7)-C(6)     | 163.85(9)   |
| C(3)-C(2)-C(7)-C(6)     | 44.00(12)   |
| C(1)-C(2)-C(7)-C(8)     | 40.14(10)   |
| C(3)-C(2)-C(7)-C(8)     | -79.70(10)  |
| C(1)-O(1)-C(8)-C(13)    | 124.20(9)   |
| C(1)-O(1)-C(8)-C(7)     | 1.60(11)    |
| C(6)-C(7)-C(8)-O(1)     | -150.28(9)  |
| C(2)-C(7)-C(8)-O(1)     | -26.82(10)  |
| C(6)-C(7)-C(8)-C(13)    | 88.58(12)   |
| C(2)-C(7)-C(8)-C(13)    | -147.97(9)  |
| C(4)-C(3)-C(9)-C(11)    | 72.39(12)   |
| C(2)-C(3)-C(9)-C(11)    | -162.23(9)  |
| C(4)-C(3)-C(9)-C(10)    | -51.37(13)  |
| C(2)-C(3)-C(9)-C(10)    | 74.01(12)   |
| O(1)-C(8)-C(13)-C(14)   | 71.77(12)   |
| C(7)-C(8)-C(13)-C(14)   | -170.33(9)  |
| C(8)-C(13)-C(14)-C(15)  | 7.57(17)    |
| C(8)-C(13)-C(14)-C(16)  | -173.55(10) |
| C(24)-O(3)-C(17)-O(4)   | 88.42(10)   |
| C(24)-O(3)-C(17)-C(18)  | -29.59(11)  |
| O(4)-C(17)-C(18)-C(19)  | 161.63(9)   |
| O(3)-C(17)-C(18)-C(19)  | -79.01(11)  |
| O(4)-C(17)-C(18)-C(23)  | -78.31(10)  |
| O(3)-C(17)-C(18)-C(23)  | 41.06(10)   |
| C(17)-C(18)-C(19)-C(20) | 161.00(9)   |
| C(23)-C(18)-C(19)-C(20) | 48.92(12)   |

|                         |             |
|-------------------------|-------------|
| C(17)-C(18)-C(19)-C(25) | -72.32(11)  |
| C(23)-C(18)-C(19)-C(25) | 175.60(8)   |
| C(18)-C(19)-C(20)-C(21) | -59.66(12)  |
| C(25)-C(19)-C(20)-C(21) | 173.40(9)   |
| C(19)-C(20)-C(21)-C(22) | 60.48(12)   |
| C(20)-C(21)-C(22)-C(28) | 126.77(12)  |
| C(20)-C(21)-C(22)-C(23) | -51.86(13)  |
| C(28)-C(22)-C(23)-C(24) | 106.43(13)  |
| C(21)-C(22)-C(23)-C(24) | -74.92(12)  |
| C(28)-C(22)-C(23)-C(18) | -135.91(12) |
| C(21)-C(22)-C(23)-C(18) | 42.74(13)   |
| C(17)-C(18)-C(23)-C(22) | -160.12(9)  |
| C(19)-C(18)-C(23)-C(22) | -40.68(12)  |
| C(17)-C(18)-C(23)-C(24) | -36.92(10)  |
| C(19)-C(18)-C(23)-C(24) | 82.53(10)   |
| C(17)-O(3)-C(24)-C(29)  | -117.03(10) |
| C(17)-O(3)-C(24)-C(23)  | 5.00(11)    |
| C(22)-C(23)-C(24)-O(3)  | 145.72(9)   |
| C(18)-C(23)-C(24)-O(3)  | 20.94(10)   |
| C(22)-C(23)-C(24)-C(29) | -93.38(12)  |
| C(18)-C(23)-C(24)-C(29) | 141.84(9)   |
| C(20)-C(19)-C(25)-C(27) | -73.50(12)  |
| C(18)-C(19)-C(25)-C(27) | 160.78(9)   |
| C(20)-C(19)-C(25)-C(26) | 50.84(13)   |
| C(18)-C(19)-C(25)-C(26) | -74.88(12)  |
| O(3)-C(24)-C(29)-C(30)  | -67.49(13)  |
| C(23)-C(24)-C(29)-C(30) | 174.44(9)   |
| C(24)-C(29)-C(30)-C(31) | -13.56(17)  |
| C(24)-C(29)-C(30)-C(32) | 169.73(11)  |

---

Symmetry transformations used to generate equivalent atoms:

Table 7. Hydrogen bonds for C<sub>16</sub>H<sub>26</sub>O<sub>2</sub> [Å and °].

---

| D-H...A | d(D-H) | d(H...A) | d(D...A) | <(DHA) |
|---------|--------|----------|----------|--------|
|---------|--------|----------|----------|--------|

---



|                   |           |           |            |           |
|-------------------|-----------|-----------|------------|-----------|
| O(2)-H(2O)...O(3) | 0.866(13) | 1.958(13) | 2.8053(13) | 165.9(14) |
| O(4)-H(4O)...O(1) | 0.876(13) | 1.999(13) | 2.8534(14) | 164.6(15) |

---

Symmetry transformations used to generate equivalent atoms:

• **X-ray crystal structure of racemic  $\alpha$ -9:**

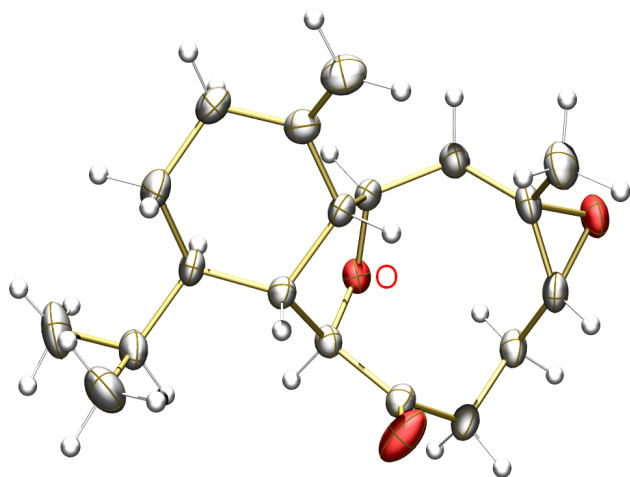

Table 8. Crystal data and structure refinement for sad.

|                                 |                                        |                              |
|---------------------------------|----------------------------------------|------------------------------|
| Identification code             | C19H28O3                               |                              |
| Empirical formula               | C19 H28 O3                             |                              |
| Formula weight                  | 304.41                                 |                              |
| Temperature                     | 100(2) K                               |                              |
| Wavelength                      | 0.71073 Å                              |                              |
| Crystal system                  | Monoclinic                             |                              |
| Space group                     | P 21/c                                 |                              |
| Unit cell dimensions            | a = 11.642(6) Å                        | $\alpha = 90^\circ$ .        |
|                                 | b = 7.337(4) Å                         | $\beta = 104.046(7)^\circ$ . |
|                                 | c = 20.650(10) Å                       | $\gamma = 90^\circ$ .        |
| Volume                          | 1711.1(14) Å <sup>3</sup>              |                              |
| Z                               | 4                                      |                              |
| Density (calculated)            | 1.182 Mg/m <sup>3</sup>                |                              |
| Absorption coefficient          | 0.078 mm <sup>-1</sup>                 |                              |
| F(000)                          | 664                                    |                              |
| Crystal size                    | 0.18 x 0.03 x 0.02 mm <sup>3</sup>     |                              |
| Theta range for data collection | 2.37 to 27.00°.                        |                              |
| Index ranges                    | -14 ≤ h ≤ 14, -9 ≤ k ≤ 9, -26 ≤ l ≤ 26 |                              |
| Reflections collected           | 18626                                  |                              |
| Independent reflections         | 3743 [R(int) = 0.0794]                 |                              |
| Completeness to theta = 27.00°  | 99.9 %                                 |                              |

|                                   |                                             |
|-----------------------------------|---------------------------------------------|
| Absorption correction             | Semi-empirical from equivalents             |
| Max. and min. transmission        | 0.9984 and 0.9861                           |
| Refinement method                 | Full-matrix least-squares on F <sup>2</sup> |
| Data / restraints / parameters    | 3743 / 28 / 283                             |
| Goodness-of-fit on F <sup>2</sup> | 1.042                                       |
| Final R indices [I>2sigma(I)]     | R1 = 0.0634, wR2 = 0.1085                   |
| R indices (all data)              | R1 = 0.1139, wR2 = 0.1245                   |
| Extinction coefficient            | na                                          |
| Largest diff. peak and hole       | 0.259 and -0.200 e.Å <sup>-3</sup>          |

Table 9. Atomic coordinates ( $\times 10^4$ ) and equivalent isotropic displacement parameters ( $\text{\AA}^2 \times 10^3$ ) for sad. U(eq) is defined as one third of the trace of the orthogonalized  $U^{ij}$  tensor.

|       | x        | y        | z       | U(eq) |
|-------|----------|----------|---------|-------|
| O(1)  | 8519(1)  | -770(2)  | 9629(1) | 38(1) |
| O(2)  | 7455(1)  | 1925(2)  | 7883(1) | 26(1) |
| O(3)  | 10133(1) | 429(3)   | 7605(1) | 52(1) |
| C(1)  | 9216(2)  | -214(3)  | 9173(1) | 31(1) |
| C(2)  | 8151(2)  | -1333(3) | 8934(1) | 30(1) |
| C(3)  | 6974(2)  | -525(3)  | 8572(1) | 32(1) |
| C(4)  | 6828(2)  | 218(3)   | 7867(1) | 26(1) |
| C(5)  | 7244(2)  | -998(3)  | 7367(1) | 25(1) |
| C(6)  | 6306(2)  | -2278(3) | 7000(1) | 31(1) |
| C(7)  | 5353(2)  | -1410(4) | 6467(1) | 40(1) |
| C(8)  | 5899(2)  | -305(4)  | 5996(1) | 38(1) |
| C(9)  | 6705(2)  | 1205(3)  | 6362(1) | 28(1) |
| C(10) | 7690(2)  | 400(3)   | 6927(1) | 24(1) |
| C(11) | 8237(2)  | 1797(3)  | 7451(1) | 24(1) |
| C(12) | 9493(2)  | 1353(3)  | 7848(1) | 27(1) |
| C(13) | 9955(2)  | 2221(3)  | 8527(1) | 31(1) |
| C(14) | 9318(2)  | 1791(3)  | 9074(1) | 31(1) |
| C(15) | 8317(3)  | -3350(4) | 8861(1) | 44(1) |
| C(16) | 6340(2)  | -4038(4) | 7124(1) | 41(1) |
| C(17) | 7208(2)  | 2423(3)  | 5891(1) | 38(1) |
| C(18) | 6256(3)  | 3625(4)  | 5457(1) | 56(1) |

---

|       |         |         |         |       |
|-------|---------|---------|---------|-------|
| C(19) | 7852(3) | 1381(5) | 5447(1) | 54(1) |
|-------|---------|---------|---------|-------|

---

Table 10. Bond lengths [ $\text{\AA}$ ] and angles [ $^\circ$ ] for *sad*.

---

|             |           |
|-------------|-----------|
| O(1)-C(1)   | 1.443(3)  |
| O(1)-C(2)   | 1.455(3)  |
| O(2)-C(11)  | 1.424(2)  |
| O(2)-C(4)   | 1.446(3)  |
| O(3)-C(12)  | 1.203(3)  |
| C(1)-C(2)   | 1.469(3)  |
| C(1)-C(14)  | 1.494(3)  |
| C(1)-H(1)   | 0.969(15) |
| C(2)-C(15)  | 1.505(3)  |
| C(2)-C(3)   | 1.513(3)  |
| C(3)-C(4)   | 1.524(3)  |
| C(3)-H(3A)  | 0.993(15) |
| C(3)-H(3B)  | 0.997(15) |
| C(4)-C(5)   | 1.529(3)  |
| C(4)-H(4)   | 0.995(15) |
| C(5)-C(6)   | 1.499(3)  |
| C(5)-C(10)  | 1.542(3)  |
| C(5)-H(5)   | 0.987(15) |
| C(6)-C(16)  | 1.315(3)  |
| C(6)-C(7)   | 1.503(3)  |
| C(7)-C(8)   | 1.519(3)  |
| C(7)-H(7A)  | 0.982(16) |
| C(7)-H(7B)  | 0.988(16) |
| C(8)-C(9)   | 1.528(3)  |
| C(8)-H(8A)  | 0.993(16) |
| C(8)-H(8B)  | 1.000(15) |
| C(9)-C(17)  | 1.538(3)  |
| C(9)-C(10)  | 1.540(3)  |
| C(9)-H(9)   | 0.988(15) |
| C(10)-C(11) | 1.514(3)  |
| C(10)-H(10) | 0.967(15) |

|                 |            |
|-----------------|------------|
| C(11)-C(12)     | 1.529(3)   |
| C(11)-H(11)     | 1.014(15)  |
| C(12)-C(13)     | 1.514(3)   |
| C(13)-C(14)     | 1.529(3)   |
| C(13)-H(13A)    | 0.992(15)  |
| C(13)-H(13B)    | 1.003(15)  |
| C(14)-H(14A)    | 0.978(15)  |
| C(14)-H(14B)    | 0.968(15)  |
| C(15)-H(15A)    | 0.973(17)  |
| C(15)-H(15B)    | 0.996(17)  |
| C(15)-H(15C)    | 0.978(16)  |
| C(16)-H(16A)    | 0.951(16)  |
| C(16)-H(16B)    | 0.969(16)  |
| C(17)-C(19)     | 1.523(4)   |
| C(17)-C(18)     | 1.525(4)   |
| C(17)-H(17)     | 0.973(16)  |
| C(18)-H(18A)    | 0.981(17)  |
| C(18)-H(18B)    | 0.978(17)  |
| C(18)-H(18C)    | 0.984(17)  |
| C(19)-H(19A)    | 0.981(17)  |
| C(19)-H(19B)    | 0.993(17)  |
| C(19)-H(19C)    | 0.994(17)  |
| <br>            |            |
| C(1)-O(1)-C(2)  | 60.94(14)  |
| C(11)-O(2)-C(4) | 108.90(15) |
| O(1)-C(1)-C(2)  | 59.95(14)  |
| O(1)-C(1)-C(14) | 116.36(19) |
| C(2)-C(1)-C(14) | 126.4(2)   |
| O(1)-C(1)-H(1)  | 112.9(13)  |
| C(2)-C(1)-H(1)  | 116.0(13)  |
| C(14)-C(1)-H(1) | 113.4(13)  |
| O(1)-C(2)-C(1)  | 59.12(13)  |
| O(1)-C(2)-C(15) | 111.35(18) |
| C(1)-C(2)-C(15) | 117.7(2)   |
| O(1)-C(2)-C(3)  | 113.01(18) |
| C(1)-C(2)-C(3)  | 122.4(2)   |

|                  |            |
|------------------|------------|
| C(15)-C(2)-C(3)  | 117.3(2)   |
| C(2)-C(3)-C(4)   | 119.28(19) |
| C(2)-C(3)-H(3A)  | 109.4(13)  |
| C(4)-C(3)-H(3A)  | 107.6(13)  |
| C(2)-C(3)-H(3B)  | 108.4(13)  |
| C(4)-C(3)-H(3B)  | 106.6(12)  |
| H(3A)-C(3)-H(3B) | 104.6(18)  |
| O(2)-C(4)-C(3)   | 110.44(17) |
| O(2)-C(4)-C(5)   | 106.30(16) |
| C(3)-C(4)-C(5)   | 117.10(19) |
| O(2)-C(4)-H(4)   | 106.0(12)  |
| C(3)-C(4)-H(4)   | 107.6(12)  |
| C(5)-C(4)-H(4)   | 108.8(12)  |
| C(6)-C(5)-C(4)   | 113.33(18) |
| C(6)-C(5)-C(10)  | 115.24(18) |
| C(4)-C(5)-C(10)  | 102.53(17) |
| C(6)-C(5)-H(5)   | 110.8(12)  |
| C(4)-C(5)-H(5)   | 109.6(12)  |
| C(10)-C(5)-H(5)  | 104.7(12)  |
| C(16)-C(6)-C(5)  | 122.2(2)   |
| C(16)-C(6)-C(7)  | 122.7(2)   |
| C(5)-C(6)-C(7)   | 115.0(2)   |
| C(6)-C(7)-C(8)   | 110.2(2)   |
| C(6)-C(7)-H(7A)  | 110.4(14)  |
| C(8)-C(7)-H(7A)  | 108.8(14)  |
| C(6)-C(7)-H(7B)  | 109.2(14)  |
| C(8)-C(7)-H(7B)  | 110.6(13)  |
| H(7A)-C(7)-H(7B) | 108(2)     |
| C(7)-C(8)-C(9)   | 111.84(19) |
| C(7)-C(8)-H(8A)  | 109.7(13)  |
| C(9)-C(8)-H(8A)  | 107.7(14)  |
| C(7)-C(8)-H(8B)  | 108.3(14)  |
| C(9)-C(8)-H(8B)  | 109.3(14)  |
| H(8A)-C(8)-H(8B) | 110.0(18)  |
| C(8)-C(9)-C(17)  | 112.95(18) |
| C(8)-C(9)-C(10)  | 110.56(19) |

|                     |            |
|---------------------|------------|
| C(17)-C(9)-C(10)    | 111.95(18) |
| C(8)-C(9)-H(9)      | 106.9(13)  |
| C(17)-C(9)-H(9)     | 107.9(13)  |
| C(10)-C(9)-H(9)     | 106.1(12)  |
| C(11)-C(10)-C(9)    | 112.82(18) |
| C(11)-C(10)-C(5)    | 99.91(16)  |
| C(9)-C(10)-C(5)     | 113.97(17) |
| C(11)-C(10)-H(10)   | 108.5(12)  |
| C(9)-C(10)-H(10)    | 110.9(12)  |
| C(5)-C(10)-H(10)    | 110.2(12)  |
| O(2)-C(11)-C(10)    | 105.71(17) |
| O(2)-C(11)-C(12)    | 110.54(16) |
| C(10)-C(11)-C(12)   | 114.89(18) |
| O(2)-C(11)-H(11)    | 106.1(11)  |
| C(10)-C(11)-H(11)   | 113.1(11)  |
| C(12)-C(11)-H(11)   | 106.2(11)  |
| O(3)-C(12)-C(13)    | 120.4(2)   |
| O(3)-C(12)-C(11)    | 120.30(19) |
| C(13)-C(12)-C(11)   | 119.08(19) |
| C(12)-C(13)-C(14)   | 118.04(19) |
| C(12)-C(13)-H(13A)  | 105.3(13)  |
| C(14)-C(13)-H(13A)  | 107.9(12)  |
| C(12)-C(13)-H(13B)  | 105.0(12)  |
| C(14)-C(13)-H(13B)  | 111.9(12)  |
| H(13A)-C(13)-H(13B) | 108.2(18)  |
| C(1)-C(14)-C(13)    | 111.94(19) |
| C(1)-C(14)-H(14A)   | 107.2(13)  |
| C(13)-C(14)-H(14A)  | 106.5(13)  |
| C(1)-C(14)-H(14B)   | 109.2(14)  |
| C(13)-C(14)-H(14B)  | 112.2(13)  |
| H(14A)-C(14)-H(14B) | 109.6(19)  |
| C(2)-C(15)-H(15A)   | 108.7(16)  |
| C(2)-C(15)-H(15B)   | 108.6(16)  |
| H(15A)-C(15)-H(15B) | 108(2)     |
| C(2)-C(15)-H(15C)   | 113.4(16)  |
| H(15A)-C(15)-H(15C) | 108(2)     |

|                     |           |
|---------------------|-----------|
| H(15B)-C(15)-H(15C) | 110(2)    |
| C(6)-C(16)-H(16A)   | 123.5(15) |
| C(6)-C(16)-H(16B)   | 119.9(14) |
| H(16A)-C(16)-H(16B) | 116(2)    |
| C(19)-C(17)-C(18)   | 109.3(2)  |
| C(19)-C(17)-C(9)    | 114.1(2)  |
| C(18)-C(17)-C(9)    | 111.9(2)  |
| C(19)-C(17)-H(17)   | 107.1(14) |
| C(18)-C(17)-H(17)   | 108.2(14) |
| C(9)-C(17)-H(17)    | 105.8(13) |
| C(17)-C(18)-H(18A)  | 110.2(18) |
| C(17)-C(18)-H(18B)  | 107.3(18) |
| H(18A)-C(18)-H(18B) | 109(2)    |
| C(17)-C(18)-H(18C)  | 113.1(17) |
| H(18A)-C(18)-H(18C) | 108(3)    |
| H(18B)-C(18)-H(18C) | 109(3)    |
| C(17)-C(19)-H(19A)  | 111.6(18) |
| C(17)-C(19)-H(19B)  | 106.0(17) |
| H(19A)-C(19)-H(19B) | 109(2)    |
| C(17)-C(19)-H(19C)  | 112.0(17) |
| H(19A)-C(19)-H(19C) | 111(2)    |
| H(19B)-C(19)-H(19C) | 107(3)    |

---

Symmetry transformations used to generate equivalent atoms:

Table 11. Anisotropic displacement parameters ( $\text{\AA}^2 \times 10^3$ ) for sad. The anisotropic displacement factor exponent takes the form:  $-2\pi^2 [ h^2 a^{*2} U^{11} + \dots + 2 h k a^* b^* U^{12} ]$

|      | $U^{11}$ | $U^{22}$ | $U^{33}$ | $U^{23}$ | $U^{13}$ | $U^{12}$ |
|------|----------|----------|----------|----------|----------|----------|
| O(1) | 49(1)    | 43(1)    | 21(1)    | 5(1)     | 4(1)     | 1(1)     |
| O(2) | 30(1)    | 26(1)    | 23(1)    | 1(1)     | 6(1)     | 3(1)     |
| O(3) | 30(1)    | 67(1)    | 52(1)    | -26(1)   | -1(1)    | 11(1)    |
| C(1) | 32(1)    | 35(1)    | 22(1)    | 5(1)     | 2(1)     | 8(1)     |
| C(2) | 40(1)    | 29(1)    | 20(1)    | 6(1)     | 5(1)     | 4(1)     |
| C(3) | 30(1)    | 39(2)    | 26(1)    | 5(1)     | 6(1)     | 0(1)     |



|       |       |       |       |       |       |        |
|-------|-------|-------|-------|-------|-------|--------|
| C(4)  | 20(1) | 31(1) | 25(1) | 4(1)  | 2(1)  | 2(1)   |
| C(5)  | 20(1) | 28(1) | 24(1) | 2(1)  | 1(1)  | 2(1)   |
| C(6)  | 29(1) | 34(1) | 31(1) | -4(1) | 9(1)  | -5(1)  |
| C(7)  | 32(1) | 48(2) | 34(1) | 1(1)  | -2(1) | -11(1) |
| C(8)  | 37(2) | 46(2) | 25(1) | 1(1)  | -4(1) | -8(1)  |
| C(9)  | 27(1) | 34(1) | 20(1) | 2(1)  | -1(1) | 0(1)   |
| C(10) | 23(1) | 28(1) | 20(1) | -1(1) | 4(1)  | -1(1)  |
| C(11) | 27(1) | 24(1) | 20(1) | 0(1)  | 5(1)  | 0(1)   |
| C(12) | 26(1) | 27(1) | 26(1) | -1(1) | 2(1)  | -2(1)  |
| C(13) | 30(1) | 32(1) | 25(1) | 0(1)  | -3(1) | -3(1)  |
| C(14) | 37(1) | 32(1) | 21(1) | 0(1)  | -1(1) | -1(1)  |
| C(15) | 53(2) | 33(2) | 40(2) | 8(1)  | 2(1)  | 3(1)   |
| C(16) | 40(2) | 36(2) | 47(2) | -9(1) | 10(1) | -6(1)  |
| C(17) | 44(2) | 42(2) | 23(1) | 3(1)  | 0(1)  | -9(1)  |
| C(18) | 78(2) | 55(2) | 31(2) | 15(1) | 4(1)  | 8(2)   |
| C(19) | 56(2) | 69(2) | 43(2) | 16(2) | 21(1) | 0(2)   |

Table 12. Hydrogen coordinates ( $\times 10^4$ ) and isotropic displacement parameters ( $\text{\AA}^2 \times 10^{-3}$ ) for sad.

|       | x        | y         | z        | U(eq) |
|-------|----------|-----------|----------|-------|
| H(1)  | 9966(15) | -850(30)  | 9247(10) | 37    |
| H(3A) | 6751(19) | 460(30)   | 8847(10) | 38    |
| H(3B) | 6350(17) | -1470(30) | 8544(10) | 38    |
| H(4)  | 5975(14) | 510(30)   | 7687(9)  | 31    |
| H(5)  | 7960(15) | -1670(30) | 7598(9)  | 30    |
| H(7A) | 4864(19) | -600(30)  | 6668(11) | 48    |
| H(7B) | 4830(18) | -2370(30) | 6220(10) | 48    |
| H(8A) | 5264(17) | 280(30)   | 5650(10) | 46    |
| H(8B) | 6371(19) | -1150(30) | 5781(11) | 46    |
| H(9)  | 6216(17) | 1980(30)  | 6582(10) | 34    |
| H(10) | 8311(15) | -130(30)  | 6750(9)  | 29    |
| H(11) | 8274(17) | 3060(20)  | 7260(9)  | 29    |

|        |           |           |          |    |
|--------|-----------|-----------|----------|----|
| H(13A) | 9902(19)  | 3550(20)  | 8445(10) | 37 |
| H(13B) | 10814(14) | 1880(30)  | 8662(10) | 37 |
| H(14A) | 9811(17)  | 2290(30)  | 9489(9)  | 37 |
| H(14B) | 8537(15)  | 2330(30)  | 8986(10) | 37 |
| H(15A) | 7638(19)  | -3980(30) | 8951(13) | 65 |
| H(15B) | 9036(18)  | -3740(30) | 9202(11) | 65 |
| H(15C) | 8390(20)  | -3700(40) | 8415(9)  | 65 |
| H(16A) | 6974(18)  | -4620(30) | 7432(10) | 49 |
| H(16B) | 5737(18)  | -4830(30) | 6862(10) | 49 |
| H(17)  | 7788(18)  | 3210(30)  | 6178(10) | 45 |
| H(18A) | 5700(20)  | 2880(40)  | 5129(12) | 85 |
| H(18B) | 6660(20)  | 4480(40)  | 5221(13) | 85 |
| H(18C) | 5800(20)  | 4330(40)  | 5716(13) | 85 |
| H(19A) | 8210(20)  | 2210(30)  | 5181(13) | 82 |
| H(19B) | 7240(20)  | 630(40)   | 5142(12) | 82 |
| H(19C) | 8450(20)  | 530(30)   | 5708(13) | 82 |

Table 13. Torsion angles [°] for sad.

|                       |             |
|-----------------------|-------------|
| C(2)-O(1)-C(1)-C(14)  | 118.6(2)    |
| C(1)-O(1)-C(2)-C(15)  | 110.4(2)    |
| C(1)-O(1)-C(2)-C(3)   | -115.1(2)   |
| C(14)-C(1)-C(2)-O(1)  | -102.2(2)   |
| O(1)-C(1)-C(2)-C(15)  | -99.5(2)    |
| C(14)-C(1)-C(2)-C(15) | 158.3(2)    |
| O(1)-C(1)-C(2)-C(3)   | 99.2(2)     |
| C(14)-C(1)-C(2)-C(3)  | -3.0(3)     |
| O(1)-C(2)-C(3)-C(4)   | 137.0(2)    |
| C(1)-C(2)-C(3)-C(4)   | 70.0(3)     |
| C(15)-C(2)-C(3)-C(4)  | -91.4(3)    |
| C(11)-O(2)-C(4)-C(3)  | 126.08(18)  |
| C(11)-O(2)-C(4)-C(5)  | -1.9(2)     |
| C(2)-C(3)-C(4)-O(2)   | -73.3(3)    |
| C(2)-C(3)-C(4)-C(5)   | 48.5(3)     |
| O(2)-C(4)-C(5)-C(6)   | -147.69(17) |

|                         |             |
|-------------------------|-------------|
| C(3)-C(4)-C(5)-C(6)     | 88.4(2)     |
| O(2)-C(4)-C(5)-C(10)    | -22.83(19)  |
| C(3)-C(4)-C(5)-C(10)    | -146.78(18) |
| C(4)-C(5)-C(6)-C(16)    | -107.2(3)   |
| C(10)-C(5)-C(6)-C(16)   | 135.1(2)    |
| C(4)-C(5)-C(6)-C(7)     | 74.8(2)     |
| C(10)-C(5)-C(6)-C(7)    | -42.9(3)    |
| C(16)-C(6)-C(7)-C(8)    | -126.0(3)   |
| C(5)-C(6)-C(7)-C(8)     | 52.0(3)     |
| C(6)-C(7)-C(8)-C(9)     | -59.7(3)    |
| C(7)-C(8)-C(9)-C(17)    | -176.3(2)   |
| C(7)-C(8)-C(9)-C(10)    | 57.3(3)     |
| C(8)-C(9)-C(10)-C(11)   | -159.74(19) |
| C(17)-C(9)-C(10)-C(11)  | 73.4(2)     |
| C(8)-C(9)-C(10)-C(5)    | -46.7(2)    |
| C(17)-C(9)-C(10)-C(5)   | -173.59(18) |
| C(6)-C(5)-C(10)-C(11)   | 160.63(18)  |
| C(4)-C(5)-C(10)-C(11)   | 37.04(19)   |
| C(6)-C(5)-C(10)-C(9)    | 40.1(3)     |
| C(4)-C(5)-C(10)-C(9)    | -83.5(2)    |
| C(4)-O(2)-C(11)-C(10)   | 26.8(2)     |
| C(4)-O(2)-C(11)-C(12)   | -98.14(18)  |
| C(9)-C(10)-C(11)-O(2)   | 81.8(2)     |
| C(5)-C(10)-C(11)-O(2)   | -39.64(19)  |
| C(9)-C(10)-C(11)-C(12)  | -156.09(18) |
| C(5)-C(10)-C(11)-C(12)  | 82.5(2)     |
| O(2)-C(11)-C(12)-O(3)   | 146.7(2)    |
| C(10)-C(11)-C(12)-O(3)  | 27.2(3)     |
| O(2)-C(11)-C(12)-C(13)  | -38.5(3)    |
| C(10)-C(11)-C(12)-C(13) | -158.00(19) |
| O(3)-C(12)-C(13)-C(14)  | -123.1(3)   |
| C(11)-C(12)-C(13)-C(14) | 62.2(3)     |
| O(1)-C(1)-C(14)-C(13)   | -173.64(17) |
| C(2)-C(1)-C(14)-C(13)   | -102.9(3)   |
| C(12)-C(13)-C(14)-C(1)  | 53.6(3)     |
| C(8)-C(9)-C(17)-C(19)   | -54.5(3)    |

|                        |           |
|------------------------|-----------|
| C(10)-C(9)-C(17)-C(19) | 71.1(3)   |
| C(8)-C(9)-C(17)-C(18)  | 70.3(3)   |
| C(10)-C(9)-C(17)-C(18) | -164.1(2) |

---

Symmetry transformations used to generate equivalent atoms:

• **X-ray crystal structure of racemic 11:**

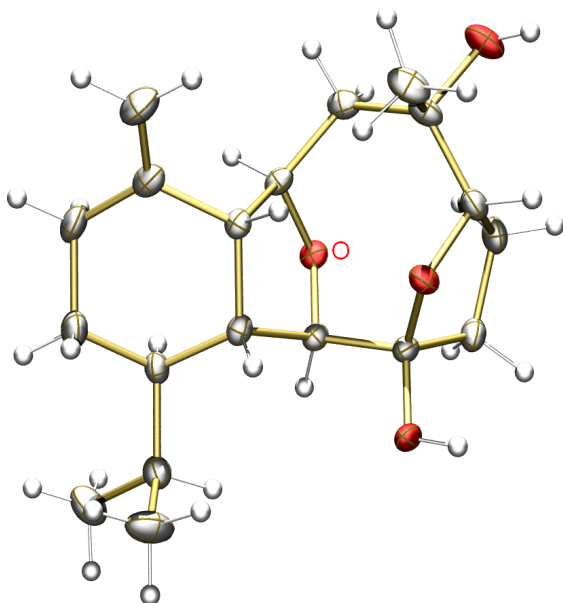

Table 1. Crystal data and structure refinement for *sad*.

|                                 |                                    |                       |
|---------------------------------|------------------------------------|-----------------------|
| Identification code             | C19H30O4                           |                       |
| Empirical formula               | C19 H30 O4                         |                       |
| Formula weight                  | 322.43                             |                       |
| Temperature                     | 173(2) K                           |                       |
| Wavelength                      | 0.71073 Å                          |                       |
| Crystal system                  | Orthorhombic                       |                       |
| Space group                     | P b c a                            |                       |
| Unit cell dimensions            | a = 9.7599(15) Å                   | $\alpha = 90^\circ$ . |
|                                 | b = 19.355(3) Å                    | $\beta = 90^\circ$ .  |
|                                 | c = 19.543(3) Å                    | $\gamma = 90^\circ$ . |
| Volume                          | 3691.8(10) Å <sup>3</sup>          |                       |
| Z                               | 8                                  |                       |
| Density (calculated)            | 1.160 Mg/m <sup>3</sup>            |                       |
| Absorption coefficient          | 0.080 mm <sup>-1</sup>             |                       |
| F(000)                          | 1408                               |                       |
| Crystal size                    | 0.08 x 0.06 x 0.03 mm <sup>3</sup> |                       |
| Theta range for data collection | 2.35 to 27.00°.                    |                       |
| Index ranges                    | 0 ≤ h ≤ 12, 0 ≤ k ≤ 24, 0 ≤ l ≤ 24 |                       |
| Reflections collected           | 4030                               |                       |

|                                   |                                             |
|-----------------------------------|---------------------------------------------|
| Independent reflections           | 4030 [R(int) = 0.0690]                      |
| Completeness to theta = 27.00°    | 99.9 %                                      |
| Absorption correction             | Semi-empirical from equivalents             |
| Max. and min. transmission        | 0.9976 and 0.9937                           |
| Refinement method                 | Full-matrix least-squares on F <sup>2</sup> |
| Data / restraints / parameters    | 4030 / 2 / 214                              |
| Goodness-of-fit on F <sup>2</sup> | 1.060                                       |
| Final R indices [I>2sigma(I)]     | R1 = 0.0600, wR2 = 0.1432                   |
| R indices (all data)              | R1 = 0.0809, wR2 = 0.1525                   |
| Extinction coefficient            | na                                          |
| Largest diff. peak and hole       | 0.525 and -0.215 e.Å <sup>-3</sup>          |

Table 2. Atomic coordinates (x 10<sup>4</sup>) and equivalent isotropic displacement parameters (Å<sup>2</sup>x 10<sup>3</sup>) for sad. U(eq) is defined as one third of the trace of the orthogonalized U<sup>ij</sup> tensor.

|       | x       | y       | z       | U(eq) |
|-------|---------|---------|---------|-------|
| C(1)  | 4134(2) | 7467(1) | 4794(1) | 19(1) |
| C(2)  | 4585(2) | 7759(1) | 5482(1) | 25(1) |
| C(3)  | 4547(2) | 8539(1) | 5391(1) | 28(1) |
| C(4)  | 3496(2) | 8649(1) | 4820(1) | 23(1) |
| C(5)  | 3862(2) | 9175(1) | 4263(1) | 23(1) |
| C(6)  | 5286(2) | 9078(1) | 3925(1) | 22(1) |
| C(7)  | 5821(2) | 8369(1) | 3705(1) | 18(1) |
| C(8)  | 4878(2) | 7923(1) | 3251(1) | 18(1) |
| C(9)  | 5217(2) | 7998(1) | 2500(1) | 23(1) |
| C(10) | 6310(2) | 7528(1) | 2233(1) | 28(1) |
| C(11) | 6010(2) | 6780(1) | 2441(1) | 27(1) |
| C(12) | 6053(2) | 6710(1) | 3220(1) | 20(1) |
| C(13) | 4978(2) | 7185(1) | 3558(1) | 18(1) |
| C(14) | 5336(2) | 7333(1) | 4309(1) | 18(1) |
| C(15) | 2700(2) | 9227(1) | 3747(1) | 31(1) |
| C(16) | 4580(2) | 8459(1) | 2114(1) | 33(1) |
| C(17) | 5931(2) | 5957(1) | 3465(1) | 24(1) |
| C(18) | 7155(2) | 5516(1) | 3252(1) | 36(1) |
| C(19) | 4625(2) | 5596(1) | 3236(2) | 40(1) |

|      |         |         |         |       |
|------|---------|---------|---------|-------|
| O(1) | 3400(2) | 6844(1) | 4834(1) | 25(1) |
| O(2) | 3245(1) | 7981(1) | 4514(1) | 21(1) |
| O(3) | 3911(2) | 9840(1) | 4596(1) | 32(1) |
| O(4) | 6176(1) | 7944(1) | 4291(1) | 19(1) |

---

Table 3. Bond lengths [ $\text{\AA}$ ] and angles [ $^\circ$ ] for *sad*.

---

|             |          |
|-------------|----------|
| C(1)-O(1)   | 1.404(2) |
| C(1)-O(2)   | 1.429(2) |
| C(1)-C(2)   | 1.524(3) |
| C(1)-C(14)  | 1.530(3) |
| C(2)-C(3)   | 1.521(3) |
| C(2)-H(2A)  | 0.9900   |
| C(2)-H(2B)  | 0.9900   |
| C(3)-C(4)   | 1.531(3) |
| C(3)-H(3A)  | 0.9900   |
| C(3)-H(3B)  | 0.9900   |
| C(4)-O(2)   | 1.446(2) |
| C(4)-C(5)   | 1.532(3) |
| C(4)-H(4A)  | 1.0000   |
| C(5)-O(3)   | 1.444(2) |
| C(5)-C(15)  | 1.521(3) |
| C(5)-C(6)   | 1.550(3) |
| C(6)-C(7)   | 1.529(3) |
| C(6)-H(6A)  | 0.9900   |
| C(6)-H(6B)  | 0.9900   |
| C(7)-O(4)   | 1.451(2) |
| C(7)-C(8)   | 1.543(3) |
| C(7)-H(7A)  | 1.0000   |
| C(8)-C(9)   | 1.512(3) |
| C(8)-C(13)  | 1.553(3) |
| C(8)-H(8A)  | 1.0000   |
| C(9)-C(16)  | 1.323(3) |
| C(9)-C(10)  | 1.496(3) |
| C(10)-C(11) | 1.531(3) |

|                 |            |
|-----------------|------------|
| C(10)-H(10A)    | 0.9900     |
| C(10)-H(10B)    | 0.9900     |
| C(11)-C(12)     | 1.530(3)   |
| C(11)-H(11A)    | 0.9900     |
| C(11)-H(11B)    | 0.9900     |
| C(12)-C(17)     | 1.539(3)   |
| C(12)-C(13)     | 1.544(3)   |
| C(12)-H(12A)    | 1.0000     |
| C(13)-C(14)     | 1.535(3)   |
| C(13)-H(13A)    | 1.0000     |
| C(14)-O(4)      | 1.440(2)   |
| C(14)-H(14A)    | 1.0000     |
| C(15)-H(15A)    | 0.9800     |
| C(15)-H(15B)    | 0.9800     |
| C(15)-H(15C)    | 0.9800     |
| C(16)-H(16A)    | 0.9500     |
| C(16)-H(16B)    | 0.9500     |
| C(17)-C(19)     | 1.521(3)   |
| C(17)-C(18)     | 1.526(3)   |
| C(17)-H(17A)    | 1.0000     |
| C(18)-H(18A)    | 0.9800     |
| C(18)-H(18B)    | 0.9800     |
| C(18)-H(18C)    | 0.9800     |
| C(19)-H(19A)    | 0.9800     |
| C(19)-H(19B)    | 0.9800     |
| C(19)-H(19C)    | 0.9800     |
| O(1)-H(1O)      | 0.8400     |
| O(3)-H(3O)      | 0.838(10)  |
| O(3)-H(3OB)     | 0.843(10)  |
| O(1)-C(1)-O(2)  | 108.03(15) |
| O(1)-C(1)-C(2)  | 114.59(16) |
| O(2)-C(1)-C(2)  | 104.73(16) |
| O(1)-C(1)-C(14) | 106.31(16) |
| O(2)-C(1)-C(14) | 110.27(15) |
| C(2)-C(1)-C(14) | 112.84(16) |



|                  |            |
|------------------|------------|
| C(3)-C(2)-C(1)   | 104.96(17) |
| C(3)-C(2)-H(2A)  | 110.8      |
| C(1)-C(2)-H(2A)  | 110.8      |
| C(3)-C(2)-H(2B)  | 110.8      |
| C(1)-C(2)-H(2B)  | 110.8      |
| H(2A)-C(2)-H(2B) | 108.8      |
| C(2)-C(3)-C(4)   | 103.89(17) |
| C(2)-C(3)-H(3A)  | 111.0      |
| C(4)-C(3)-H(3A)  | 111.0      |
| C(2)-C(3)-H(3B)  | 111.0      |
| C(4)-C(3)-H(3B)  | 111.0      |
| H(3A)-C(3)-H(3B) | 109.0      |
| O(2)-C(4)-C(3)   | 106.86(16) |
| O(2)-C(4)-C(5)   | 109.84(16) |
| C(3)-C(4)-C(5)   | 116.99(17) |
| O(2)-C(4)-H(4A)  | 107.6      |
| C(3)-C(4)-H(4A)  | 107.6      |
| C(5)-C(4)-H(4A)  | 107.6      |
| O(3)-C(5)-C(15)  | 105.28(16) |
| O(3)-C(5)-C(4)   | 106.30(17) |
| C(15)-C(5)-C(4)  | 109.92(17) |
| O(3)-C(5)-C(6)   | 105.69(16) |
| C(15)-C(5)-C(6)  | 113.20(19) |
| C(4)-C(5)-C(6)   | 115.59(17) |
| C(7)-C(6)-C(5)   | 122.29(17) |
| C(7)-C(6)-H(6A)  | 106.8      |
| C(5)-C(6)-H(6A)  | 106.8      |
| C(7)-C(6)-H(6B)  | 106.8      |
| C(5)-C(6)-H(6B)  | 106.8      |
| H(6A)-C(6)-H(6B) | 106.6      |
| O(4)-C(7)-C(6)   | 111.69(16) |
| O(4)-C(7)-C(8)   | 106.21(15) |
| C(6)-C(7)-C(8)   | 117.37(16) |
| O(4)-C(7)-H(7A)  | 107.0      |
| C(6)-C(7)-H(7A)  | 107.0      |
| C(8)-C(7)-H(7A)  | 107.0      |

|                     |            |
|---------------------|------------|
| C(9)-C(8)-C(7)      | 112.05(16) |
| C(9)-C(8)-C(13)     | 116.72(16) |
| C(7)-C(8)-C(13)     | 104.72(15) |
| C(9)-C(8)-H(8A)     | 107.7      |
| C(7)-C(8)-H(8A)     | 107.7      |
| C(13)-C(8)-H(8A)    | 107.7      |
| C(16)-C(9)-C(10)    | 123.1(2)   |
| C(16)-C(9)-C(8)     | 121.0(2)   |
| C(10)-C(9)-C(8)     | 115.88(18) |
| C(9)-C(10)-C(11)    | 110.19(17) |
| C(9)-C(10)-H(10A)   | 109.6      |
| C(11)-C(10)-H(10A)  | 109.6      |
| C(9)-C(10)-H(10B)   | 109.6      |
| C(11)-C(10)-H(10B)  | 109.6      |
| H(10A)-C(10)-H(10B) | 108.1      |
| C(12)-C(11)-C(10)   | 110.10(17) |
| C(12)-C(11)-H(11A)  | 109.6      |
| C(10)-C(11)-H(11A)  | 109.6      |
| C(12)-C(11)-H(11B)  | 109.6      |
| C(10)-C(11)-H(11B)  | 109.6      |
| H(11A)-C(11)-H(11B) | 108.2      |
| C(11)-C(12)-C(17)   | 113.04(17) |
| C(11)-C(12)-C(13)   | 110.72(17) |
| C(17)-C(12)-C(13)   | 112.30(16) |
| C(11)-C(12)-H(12A)  | 106.8      |
| C(17)-C(12)-H(12A)  | 106.8      |
| C(13)-C(12)-H(12A)  | 106.8      |
| C(14)-C(13)-C(12)   | 111.38(16) |
| C(14)-C(13)-C(8)    | 102.31(15) |
| C(12)-C(13)-C(8)    | 115.18(16) |
| C(14)-C(13)-H(13A)  | 109.2      |
| C(12)-C(13)-H(13A)  | 109.2      |
| C(8)-C(13)-H(13A)   | 109.2      |
| O(4)-C(14)-C(1)     | 108.24(15) |
| O(4)-C(14)-C(13)    | 105.00(14) |
| C(1)-C(14)-C(13)    | 116.66(16) |

|                     |            |
|---------------------|------------|
| O(4)-C(14)-H(14A)   | 108.9      |
| C(1)-C(14)-H(14A)   | 108.9      |
| C(13)-C(14)-H(14A)  | 108.9      |
| C(5)-C(15)-H(15A)   | 109.5      |
| C(5)-C(15)-H(15B)   | 109.5      |
| H(15A)-C(15)-H(15B) | 109.5      |
| C(5)-C(15)-H(15C)   | 109.5      |
| H(15A)-C(15)-H(15C) | 109.5      |
| H(15B)-C(15)-H(15C) | 109.5      |
| C(9)-C(16)-H(16A)   | 120.0      |
| C(9)-C(16)-H(16B)   | 120.0      |
| H(16A)-C(16)-H(16B) | 120.0      |
| C(19)-C(17)-C(18)   | 108.63(19) |
| C(19)-C(17)-C(12)   | 114.16(18) |
| C(18)-C(17)-C(12)   | 112.63(18) |
| C(19)-C(17)-H(17A)  | 107.0      |
| C(18)-C(17)-H(17A)  | 107.0      |
| C(12)-C(17)-H(17A)  | 107.0      |
| C(17)-C(18)-H(18A)  | 109.5      |
| C(17)-C(18)-H(18B)  | 109.5      |
| H(18A)-C(18)-H(18B) | 109.5      |
| C(17)-C(18)-H(18C)  | 109.5      |
| H(18A)-C(18)-H(18C) | 109.5      |
| H(18B)-C(18)-H(18C) | 109.5      |
| C(17)-C(19)-H(19A)  | 109.5      |
| C(17)-C(19)-H(19B)  | 109.5      |
| H(19A)-C(19)-H(19B) | 109.5      |
| C(17)-C(19)-H(19C)  | 109.5      |
| H(19A)-C(19)-H(19C) | 109.5      |
| H(19B)-C(19)-H(19C) | 109.5      |
| C(1)-O(1)-H(10)     | 109.5      |
| C(1)-O(2)-C(4)      | 111.23(15) |
| C(5)-O(3)-H(30)     | 113(4)     |
| C(5)-O(3)-H(30B)    | 115(4)     |
| H(30)-O(3)-H(30B)   | 119(6)     |
| C(14)-O(4)-C(7)     | 110.44(14) |

---

Symmetry transformations used to generate equivalent atoms:

Table 4. Anisotropic displacement parameters ( $\text{\AA}^2 \times 10^3$ ) for sad. The anisotropic displacement factor exponent takes the form:  $-2\pi^2 [h^2 a^{*2} U^{11} + \dots + 2 h k a^* b^* U^{12}]$

|       | $U^{11}$ | $U^{22}$ | $U^{33}$ | $U^{23}$ | $U^{13}$ | $U^{12}$ |
|-------|----------|----------|----------|----------|----------|----------|
| C(1)  | 20(1)    | 18(1)    | 20(1)    | 3(1)     | 3(1)     | 1(1)     |
| C(2)  | 29(1)    | 29(1)    | 18(1)    | 0(1)     | 4(1)     | 3(1)     |
| C(3)  | 34(1)    | 29(1)    | 21(1)    | -7(1)    | 4(1)     | 2(1)     |
| C(4)  | 22(1)    | 19(1)    | 26(1)    | -5(1)    | 3(1)     | 2(1)     |
| C(5)  | 22(1)    | 15(1)    | 30(1)    | -5(1)    | -6(1)    | -1(1)    |
| C(6)  | 22(1)    | 21(1)    | 24(1)    | 0(1)     | -5(1)    | -6(1)    |
| C(7)  | 16(1)    | 22(1)    | 18(1)    | 3(1)     | -2(1)    | -4(1)    |
| C(8)  | 17(1)    | 20(1)    | 16(1)    | 0(1)     | -2(1)    | -1(1)    |
| C(9)  | 25(1)    | 26(1)    | 18(1)    | 0(1)     | -4(1)    | -11(1)   |
| C(10) | 31(1)    | 36(1)    | 16(1)    | 0(1)     | 4(1)     | -8(1)    |
| C(11) | 30(1)    | 31(1)    | 19(1)    | -6(1)    | 3(1)     | -4(1)    |
| C(12) | 17(1)    | 23(1)    | 20(1)    | -5(1)    | 2(1)     | -1(1)    |
| C(13) | 13(1)    | 23(1)    | 17(1)    | 0(1)     | 0(1)     | -2(1)    |
| C(14) | 17(1)    | 19(1)    | 17(1)    | 2(1)     | 0(1)     | -1(1)    |
| C(15) | 27(1)    | 24(1)    | 42(1)    | -3(1)    | -11(1)   | 6(1)     |
| C(16) | 36(1)    | 38(1)    | 24(1)    | 8(1)     | -3(1)    | -7(1)    |
| C(17) | 26(1)    | 24(1)    | 23(1)    | -2(1)    | 1(1)     | 2(1)     |
| C(18) | 35(1)    | 30(1)    | 44(1)    | -9(1)    | -2(1)    | 6(1)     |
| C(19) | 32(1)    | 24(1)    | 65(2)    | 4(1)     | 3(1)     | -7(1)    |
| O(1)  | 26(1)    | 19(1)    | 29(1)    | 2(1)     | 13(1)    | -2(1)    |
| O(2)  | 19(1)    | 17(1)    | 26(1)    | -1(1)    | 0(1)     | 1(1)     |
| O(3)  | 35(1)    | 19(1)    | 43(1)    | -8(1)    | -6(1)    | 1(1)     |
| O(4)  | 18(1)    | 21(1)    | 18(1)    | 1(1)     | -4(1)    | -2(1)    |

---

Table 5. Hydrogen coordinates ( $\times 10^4$ ) and isotropic displacement parameters ( $\text{\AA}^2 \times 10^3$ ) for sad.

---

|        | x        | y        | z        | U(eq) |
|--------|----------|----------|----------|-------|
| H(2A)  | 3950     | 7612     | 5850     | 30    |
| H(2B)  | 5521     | 7601     | 5598     | 30    |
| H(3A)  | 5458     | 8718     | 5255     | 33    |
| H(3B)  | 4255     | 8771     | 5818     | 33    |
| H(4A)  | 2622     | 8805     | 5039     | 27    |
| H(6A)  | 5299     | 9375     | 3513     | 27    |
| H(6B)  | 5970     | 9272     | 4246     | 27    |
| H(7A)  | 6684     | 8449     | 3442     | 22    |
| H(8A)  | 3917     | 8089     | 3318     | 21    |
| H(10A) | 7211     | 7670     | 2419     | 33    |
| H(10B) | 6352     | 7562     | 1728     | 33    |
| H(11A) | 5094     | 6644     | 2270     | 32    |
| H(11B) | 6698     | 6469     | 2233     | 32    |
| H(12A) | 6973     | 6879     | 3371     | 24    |
| H(13A) | 4058     | 6959     | 3535     | 21    |
| H(14A) | 5893     | 6940     | 4492     | 21    |
| H(15A) | 1830     | 9290     | 3990     | 46    |
| H(15B) | 2660     | 8802     | 3475     | 46    |
| H(15C) | 2860     | 9622     | 3444     | 46    |
| H(16A) | 4812     | 8503     | 1644     | 39    |
| H(16B) | 3892     | 8746     | 2307     | 39    |
| H(17A) | 5919     | 5967     | 3976     | 29    |
| H(18A) | 7028     | 5042     | 3418     | 55    |
| H(18B) | 7995     | 5710     | 3450     | 55    |
| H(18C) | 7230     | 5513     | 2752     | 55    |
| H(19A) | 4621     | 5120     | 3410     | 60    |
| H(19B) | 4584     | 5589     | 2735     | 60    |
| H(19C) | 3829     | 5844     | 3417     | 60    |
| H(1O)  | 2690     | 6904     | 5070     | 37    |
| H(3O)  | 4600(40) | 9890(30) | 4840(30) | 49    |
| H(3OB) | 3150(30) | 9980(30) | 4740(30) | 49    |

Table 6. Torsion angles [ $^{\circ}$ ] for sad.

---

|                         |             |
|-------------------------|-------------|
| O(1)-C(1)-C(2)-C(3)     | -147.27(17) |
| O(2)-C(1)-C(2)-C(3)     | -29.1(2)    |
| C(14)-C(1)-C(2)-C(3)    | 90.9(2)     |
| C(1)-C(2)-C(3)-C(4)     | 25.5(2)     |
| C(2)-C(3)-C(4)-O(2)     | -13.0(2)    |
| C(2)-C(3)-C(4)-C(5)     | -136.54(18) |
| O(2)-C(4)-C(5)-O(3)     | 172.35(15)  |
| C(3)-C(4)-C(5)-O(3)     | -65.7(2)    |
| O(2)-C(4)-C(5)-C(15)    | 58.9(2)     |
| C(3)-C(4)-C(5)-C(15)    | -179.12(17) |
| O(2)-C(4)-C(5)-C(6)     | -70.8(2)    |
| C(3)-C(4)-C(5)-C(6)     | 51.2(2)     |
| O(3)-C(5)-C(6)-C(7)     | 161.37(18)  |
| C(15)-C(5)-C(6)-C(7)    | -83.9(2)    |
| C(4)-C(5)-C(6)-C(7)     | 44.1(3)     |
| C(5)-C(6)-C(7)-O(4)     | -71.4(2)    |
| C(5)-C(6)-C(7)-C(8)     | 51.6(3)     |
| O(4)-C(7)-C(8)-C(9)     | -138.07(16) |
| C(6)-C(7)-C(8)-C(9)     | 96.2(2)     |
| O(4)-C(7)-C(8)-C(13)    | -10.62(19)  |
| C(6)-C(7)-C(8)-C(13)    | -136.34(17) |
| C(7)-C(8)-C(9)-C(16)    | -92.7(2)    |
| C(13)-C(8)-C(9)-C(16)   | 146.6(2)    |
| C(7)-C(8)-C(9)-C(10)    | 86.6(2)     |
| C(13)-C(8)-C(9)-C(10)   | -34.1(2)    |
| C(16)-C(9)-C(10)-C(11)  | -130.5(2)   |
| C(8)-C(9)-C(10)-C(11)   | 50.2(2)     |
| C(9)-C(10)-C(11)-C(12)  | -63.6(2)    |
| C(10)-C(11)-C(12)-C(17) | -173.13(17) |
| C(10)-C(11)-C(12)-C(13) | 59.9(2)     |
| C(11)-C(12)-C(13)-C(14) | -158.85(16) |
| C(17)-C(12)-C(13)-C(14) | 73.7(2)     |
| C(11)-C(12)-C(13)-C(8)  | -42.9(2)    |
| C(17)-C(12)-C(13)-C(8)  | -170.34(16) |

|                         |             |
|-------------------------|-------------|
| C(9)-C(8)-C(13)-C(14)   | 151.20(16)  |
| C(7)-C(8)-C(13)-C(14)   | 26.67(18)   |
| C(9)-C(8)-C(13)-C(12)   | 30.2(2)     |
| C(7)-C(8)-C(13)-C(12)   | -94.32(18)  |
| O(1)-C(1)-C(14)-O(4)    | -175.88(14) |
| O(2)-C(1)-C(14)-O(4)    | 67.26(19)   |
| C(2)-C(1)-C(14)-O(4)    | -49.5(2)    |
| O(1)-C(1)-C(14)-C(13)   | 66.1(2)     |
| O(2)-C(1)-C(14)-C(13)   | -50.8(2)    |
| C(2)-C(1)-C(14)-C(13)   | -167.53(17) |
| C(12)-C(13)-C(14)-O(4)  | 89.83(18)   |
| C(8)-C(13)-C(14)-O(4)   | -33.75(18)  |
| C(12)-C(13)-C(14)-C(1)  | -150.36(17) |
| C(8)-C(13)-C(14)-C(1)   | 86.06(19)   |
| C(11)-C(12)-C(17)-C(19) | -58.8(2)    |
| C(13)-C(12)-C(17)-C(19) | 67.3(2)     |
| C(11)-C(12)-C(17)-C(18) | 65.6(2)     |
| C(13)-C(12)-C(17)-C(18) | -168.20(18) |
| O(1)-C(1)-O(2)-C(4)     | 144.17(16)  |
| C(2)-C(1)-O(2)-C(4)     | 21.6(2)     |
| C(14)-C(1)-O(2)-C(4)    | -100.04(18) |
| C(3)-C(4)-O(2)-C(1)     | -5.5(2)     |
| C(5)-C(4)-O(2)-C(1)     | 122.38(17)  |
| C(1)-C(14)-O(4)-C(7)    | -96.40(17)  |
| C(13)-C(14)-O(4)-C(7)   | 28.87(19)   |
| C(6)-C(7)-O(4)-C(14)    | 117.83(16)  |
| C(8)-C(7)-O(4)-C(14)    | -11.28(19)  |

---

Symmetry transformations used to generate equivalent atoms:

Table 7. Hydrogen bonds for sad [ $\text{\AA}$  and  $^\circ$ ].

| D-H...A             | d(D-H)    | d(H...A)  | d(D...A)   | $\angle$ (DHA) |
|---------------------|-----------|-----------|------------|----------------|
| O(1)-H(10)...O(4)#1 | 0.84      | 1.96      | 2.7937(19) | 173.4          |
| O(3)-H(30)...O(3)#2 | 0.838(10) | 1.890(15) | 2.721(3)   | 171(6)         |

---

Symmetry transformations used to generate equivalent atoms:

#1  $x-1/2, -y+3/2, -z+1$  #2  $-x+1, -y+2, -z+1$
